# Supplementary material
Source: PubMed Central journal article supplement (PMC7655690)

**A**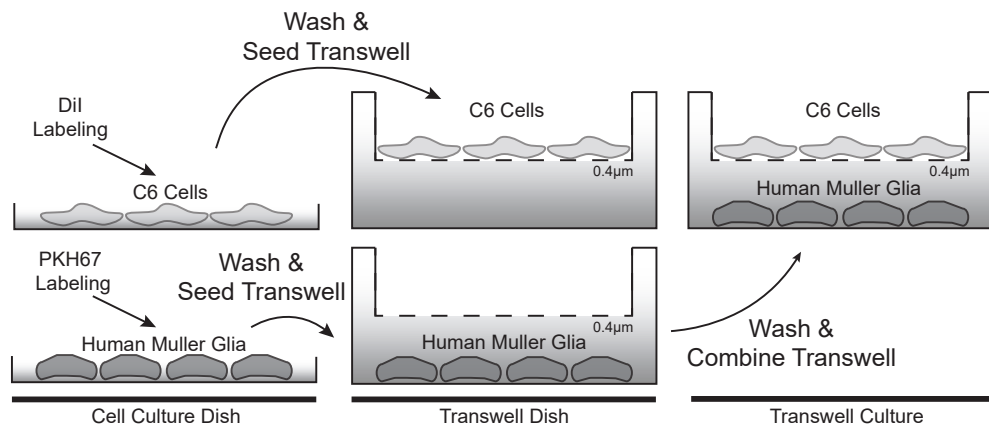**B**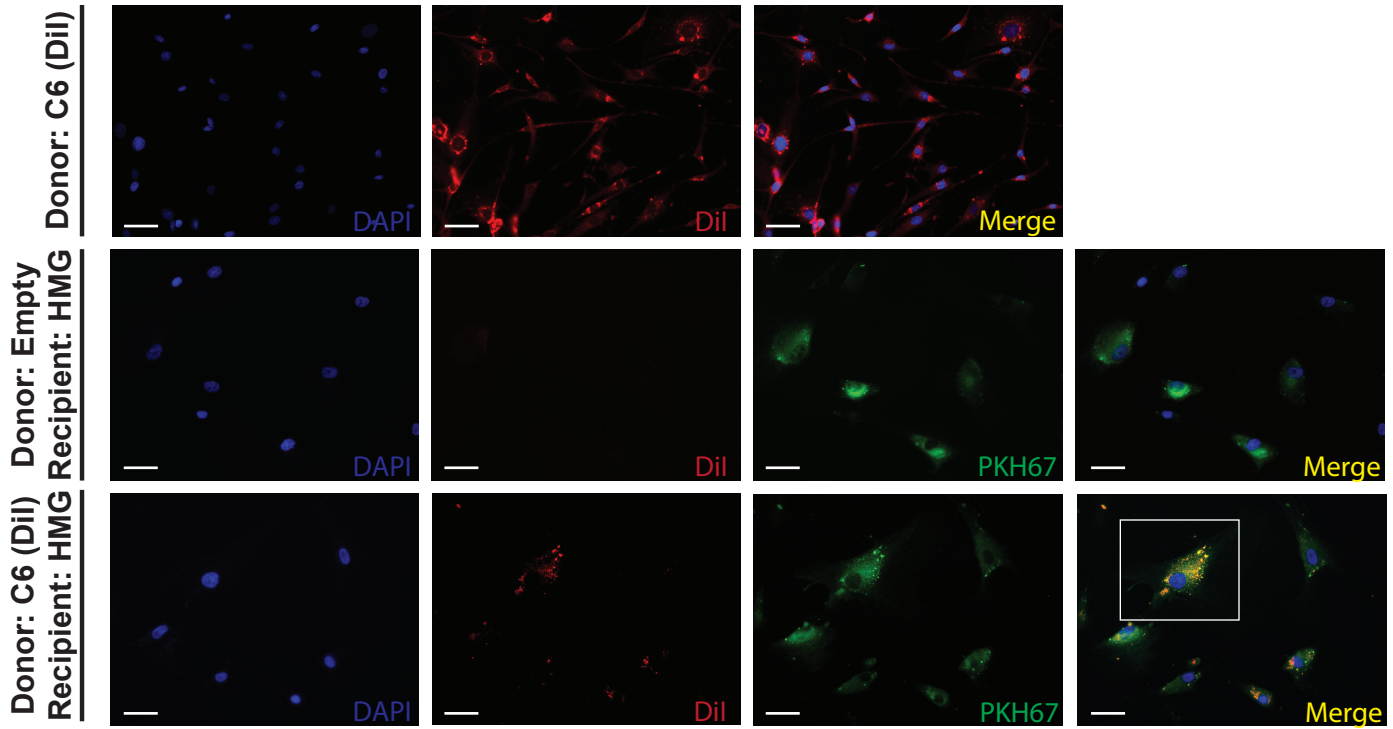**C**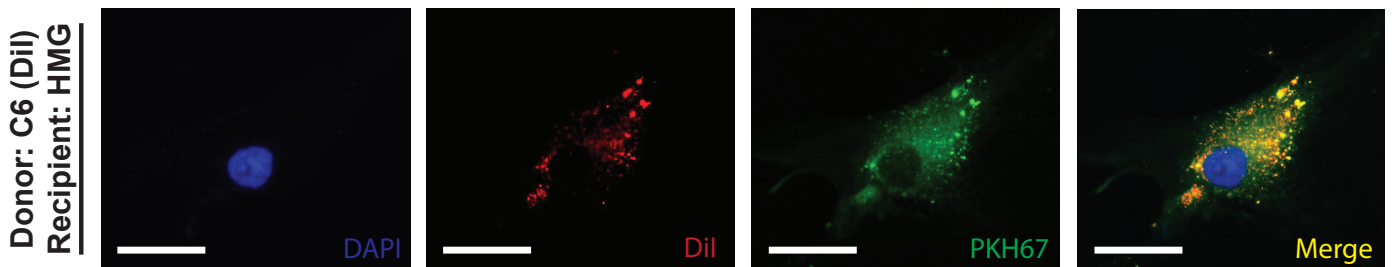

Supplement: NIHMS1632888-supplement-1.pdf [file NIHMS1632888-supplement-1.pdf]

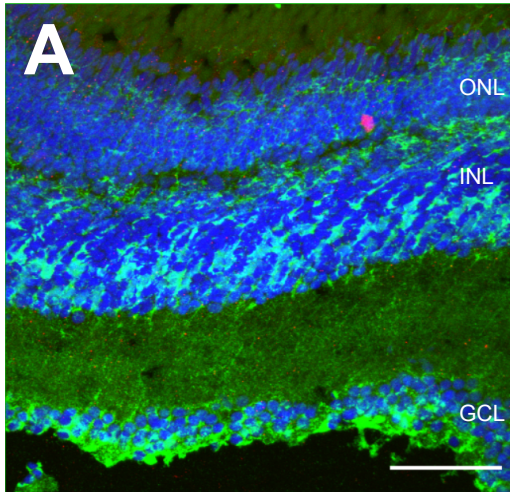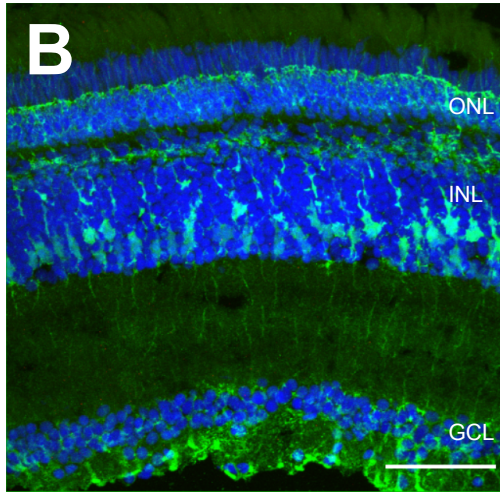

GFAP:GFP/PCNA/TO-PRO-3

Supplement: NIHMS1632888-supplement-3.pdf [file NIHMS1632888-supplement-3.pdf]

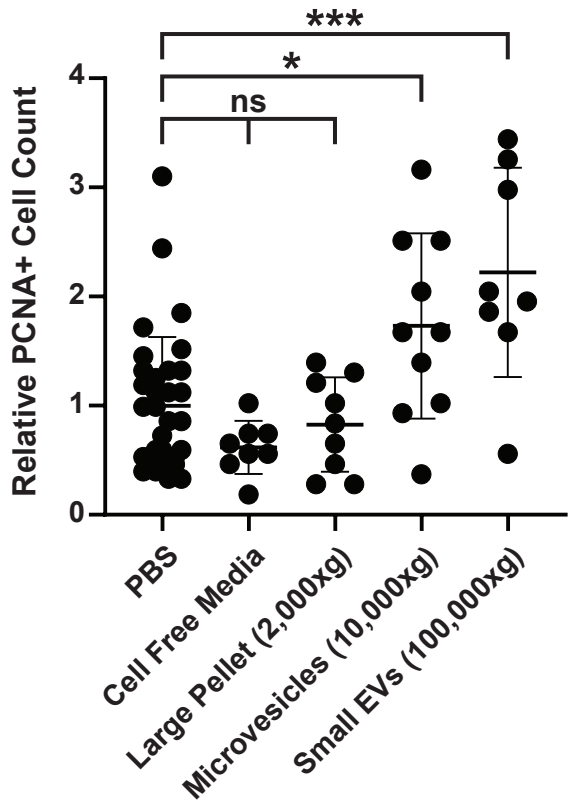

Supplement: NIHMS1632888-supplement-4.pdf [file NIHMS1632888-supplement-4.pdf]

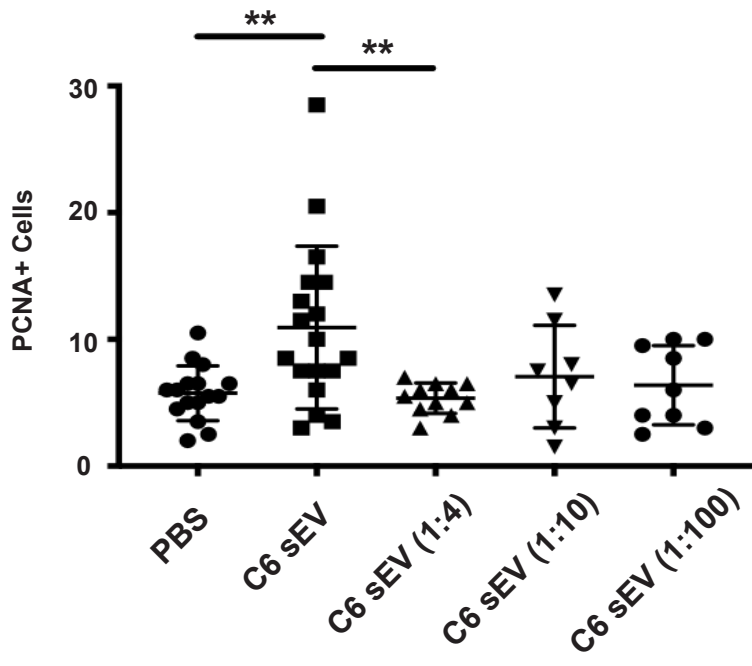

Supplement: NIHMS1632888-supplement-5.pdf [file NIHMS1632888-supplement-5.pdf]

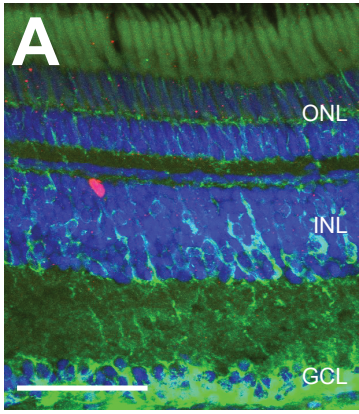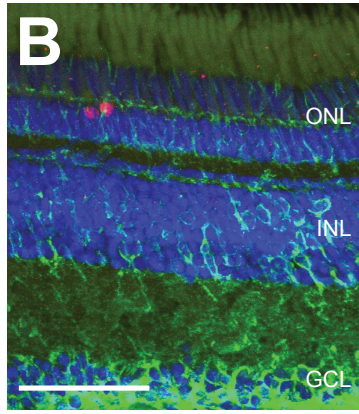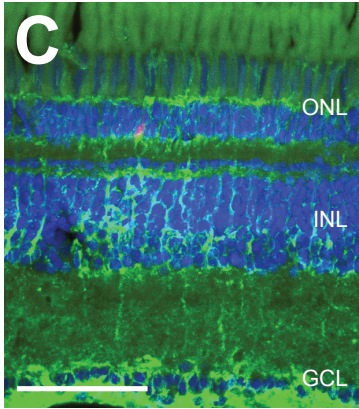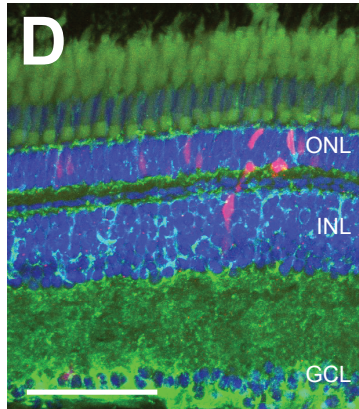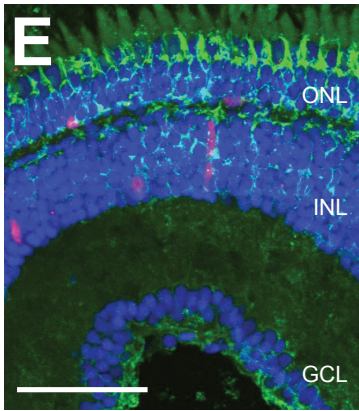

**GS/PCNA/TO-PRO-3**

Supplement: NIHMS1632888-supplement-6.pdf [file NIHMS1632888-supplement-6.pdf]

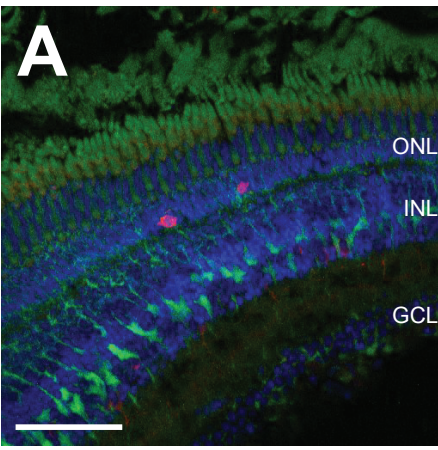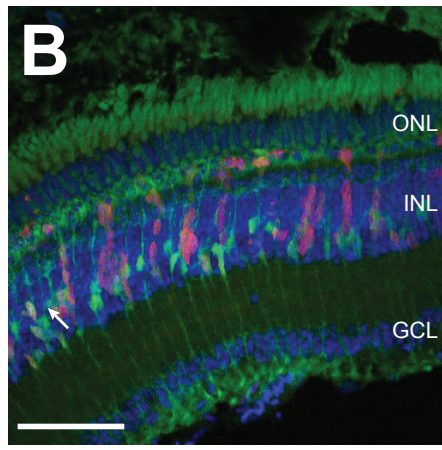

GFAP:GFP/PCNA/TO-PRO-3

Supplement: NIHMS1632888-supplement-7.pdf [file NIHMS1632888-supplement-7.pdf]
